# Supplementary material for: You can’t “nudge” nuggets: An investigation of college late-night dining with behavioral economics interventions
Source: PLoS One. 2018 May 31;13(5):e0198162. doi: 10.1371/journal.pone.0198162 (PMC5979022; doi:10.1371/journal.pone.0198162)
Supplement: S4 Dataset — (XLSX) [file pone.0198162.s004.xlsx]

## Sheet: Sheet1
Date	Male	Female	Entrees	Crunchy Munchy	Comments
4.17.17	70	85	Pasta, Chicken Nuggets, Sweet Potato Fries, Chicken Burgers	Chips, Salsa, Hummus, Pretzels, Pasta Salad, Pita Chips, Carrot Sticks, Brocolli, Green Beans	Had a guy singing the words "crunchy munchy", woman: "This is awesome!"
4.18.17	84	95	Pasta, Pulled chicken BBQ	Kale, green peppers, tomatos, mushrooms and green beans w/ dressing; organic maple yogurt, grapes, honeydew melon; chips and salsa, red pepper hummus, carrot sticks, celery, brocolli; french toasted crostini w/ EVOO, garlic and seasonings; Rold Gold pretzels; smartfood white cheddar popcorn bags; wheat pasta salad w/ spinach, feta, olives, red peppers, balsalmic vinegar	"none of it's healthy"; "I feel bad about myself after I eat this stuff"
4.19.17	141	102	Chili Dogs	veggies, salad, dips, chips, salsa, snack bags
4.24.17	130	87	Chicken nuggets		"Actually, like, decent food"; "They have crunch munchies!"
4.25.17	98	105	Pasta, Garlic Bread, Simple Chicken Brunswick Stew, White Rice	Whole Maple Organic Yogurt, Grapes, Pineapple, Green Beans, Tomato, Green Peppers, Lettuce, Mushrooms, Chips, Salsa, Roasted Red Pepper Hummus, carrots, celery, cucumbers, brocolli, cauliflower, fruit/nut trail mix, potato salad, kettle cooked potato chips
4.26.17	91	121	Cheese Tortellini, Pasta	Honeydew, Cantaloupe, Plain Nonfat Greek Yogurt, Peppers, Tomatoes, Green Beans, Onions, Lettuce, Cucumbers, Celery, Brocolli, Trail Mix, Pretzels, Popcorn, Carrot Sticks, Hummus, Potato Chips, Salsa, Sauteed Veggies
5.1.17	135	176	Chicken nuggets, french fries, pasta, veggie risotto, sweet potatoes	chips, salsa, pretzels, trail mix, popcorn, pico de gallo, hummus, yogurt, raspberries, pineapple, tomatos, peppers, mushrooms, cucumbers, spinach, celery, carrots, graps, watermelon	"Oh shit! When did they get this?"; "there's raspberries!"; "I just ate mushrooms at Late Night night, it was an incredible experience"
5.2.17	96	132	Pasta, Pulled Pork	Chips, salsa, olives, trail mix, popcorn, hummus, carrots, peppers, cucumbers, brocolli, celery, yogurt, strawberries	"They have strawberries. But they don't have pretzels, so I'm upset"
5.3.17	119	108	Corn dogs, pasta, Sweet Potato Fries	Cantaloupe, Watermelon, Kale, Cherry Tomatoes, Red Onions, Mushrooms, Applesauce, Whole maple organic yogurt, chips, salsa, carrots, cucumbers, bell peppers, celery, brocolli, hummus, pasta salad, trail mix, chocolate pudding
